# Supplementary material for: Time-restricted feeding promotes muscle function through purine cycle and AMPK signaling in Drosophila obesity models
Source: PubMed Central journal article supplement (PMC9944249; doi:10.1038/s41467-023-36474-4), 2023-02-21
Supplement: 41467_2023_36474_MOESM1_ESM.pdf [file 41467_2023_36474_MOESM1_ESM.pdf]

Supplementary Materials for

**Time-restricted feeding promotes muscle function through purine cycle and AMPK signaling in *Drosophila* obesity models**

Melkani et al., Correspondence and requests for materials should be addressed to G.C.M

(Email: girishmelkani@uabmc.edu)

This PFD file includes:

Supplementary Figures 1 to 12

# Figure S1

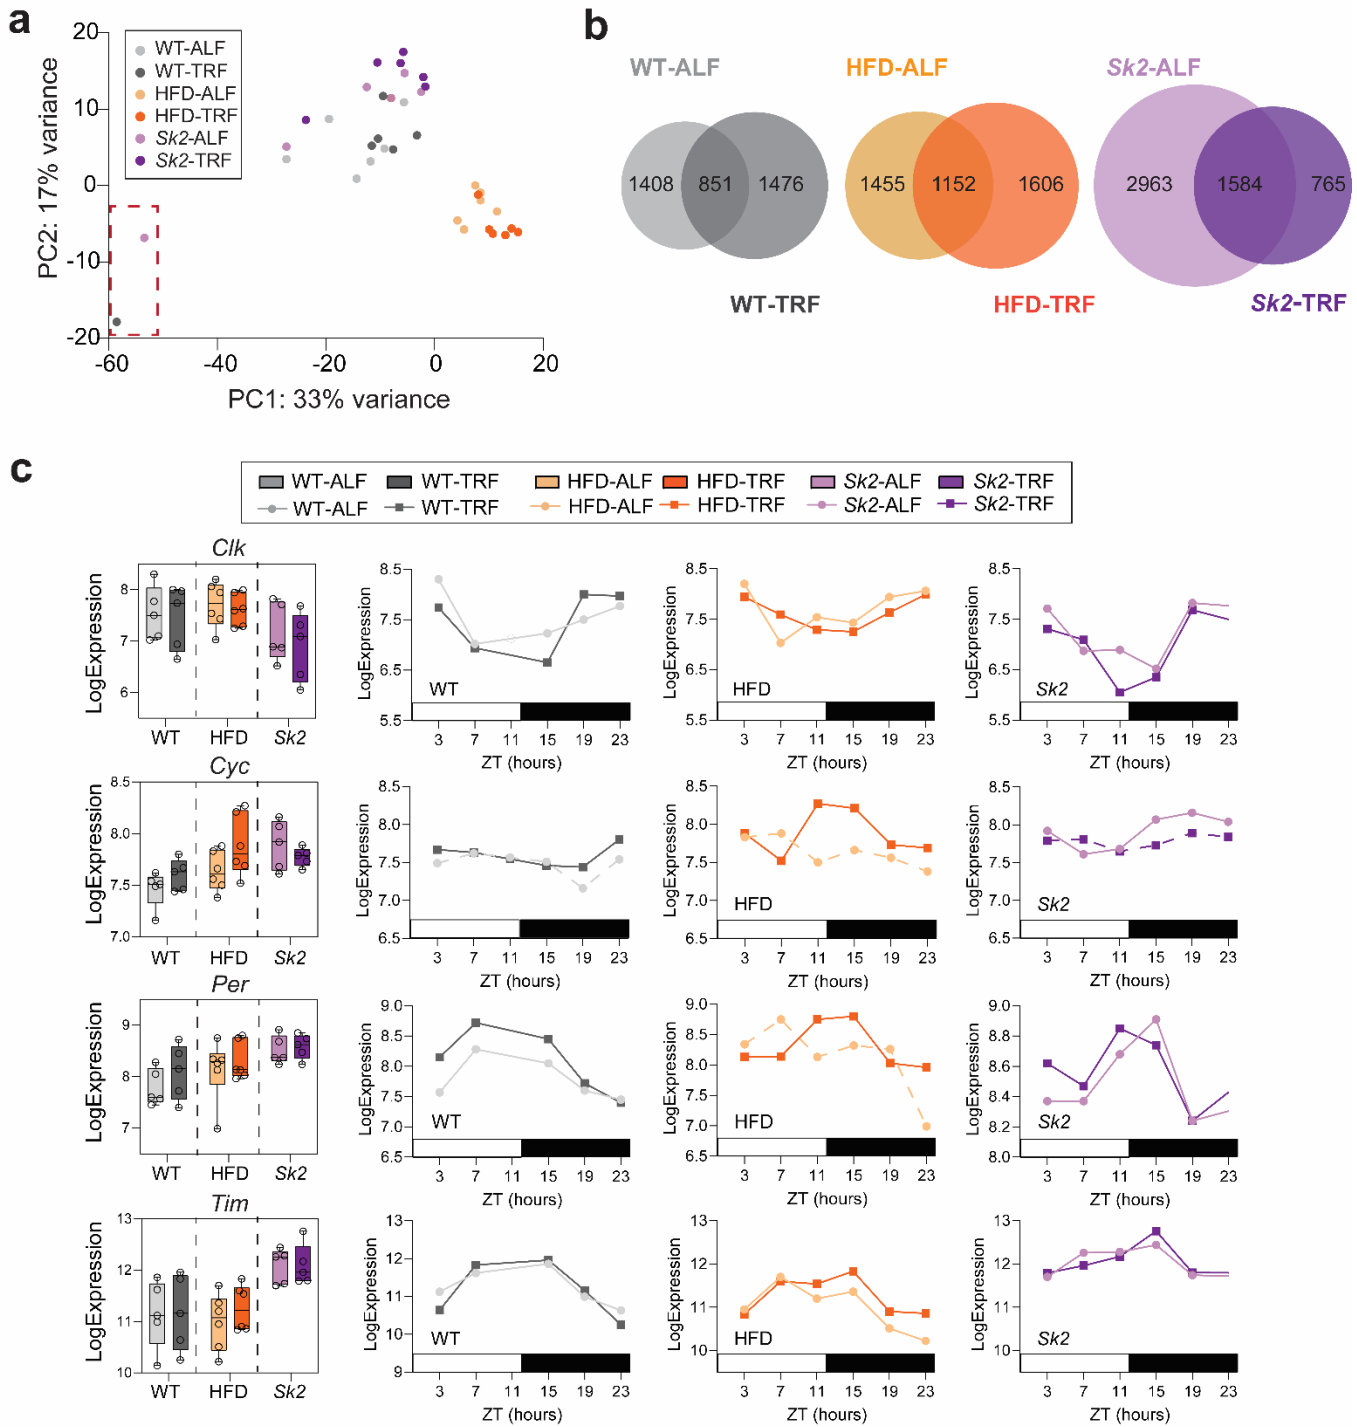

**Figure S1: Overview of transcriptome data in WT, HFD, and *Sk2* models.**

(a) PCA plot of skeletal muscle transcriptome data. The red rectangle indicated the two outliers (WT-TRF-ZT11 and *Sk2*-ALF-ZT23) and data from the two outliers were removed from all downstream analyses.

(b) Rhythmic skeletal muscle transcripts identified under ALF and TRF in WT, HFD, and *Sk2* flies.

(c) Expression level of *Clk*, *Cyc*, *Per*, and *Tim* under ALF and TRF in WT, HFD, and *Sk2* flies. Left panel, N = 5 time points in WT and *Sk2*. N = 6 time points in HFD. Right panel, expression levels at each time point.

Empirical\_JTK rhythmicity detection was presented as a solid line (Benjamini-Hochberg adjusted  $p$ -value  $\leq 0.05$ ) or dash line (Benjamini-Hochberg adjusted  $p$ -value  $> 0.05$ ).

# Figure S2

**a**

|            | <i>Drosophila</i><br>Ortholog | Human<br>Ortholog | Fold Change (TRF / ALF) |       |       | Annotated Function                                     |
|------------|-------------------------------|-------------------|-------------------------|-------|-------|--------------------------------------------------------|
|            |                               |                   | WT                      | HFD   | Sk2   |                                                        |
| Up Genes   | CG6188                        | <i>Gnmt</i>       | 2.80                    | 6.40  | 2.39  | Glycine N-methyltransferase                            |
|            | CG6385                        | <i>Sardh</i>      | 1.35                    | 2.47  | 1.44  | Sarcosine dehydrogenase                                |
|            | CG5955                        | <i>Tdh</i>        | 1.60                    | 2.02  | 1.64  | Predicted to have L-threonine 3-dehydrogenase activity |
|            | CG6806                        | N/A               | 3.25                    | 3.46  | 2.23  | Larval serum protein 2                                 |
|            | CG5896                        | N/A               | 1.31                    | 1.68  | 1.37  | Gram-positive specific serine protease                 |
| Down Genes | CG7997                        | <i>Gla</i>        | -1.63                   | -1.73 | -1.48 | Predicted to have alpha-galactosidase activity         |
|            | CG1942                        | <i>Dgat2</i>      | -1.51                   | -1.93 | -1.55 | Diacylglycerol O-acyltransferase 2                     |
|            | CG13992                       | N/A               | -5.4                    | -5.33 | -4.04 | Unknown                                                |

**b**

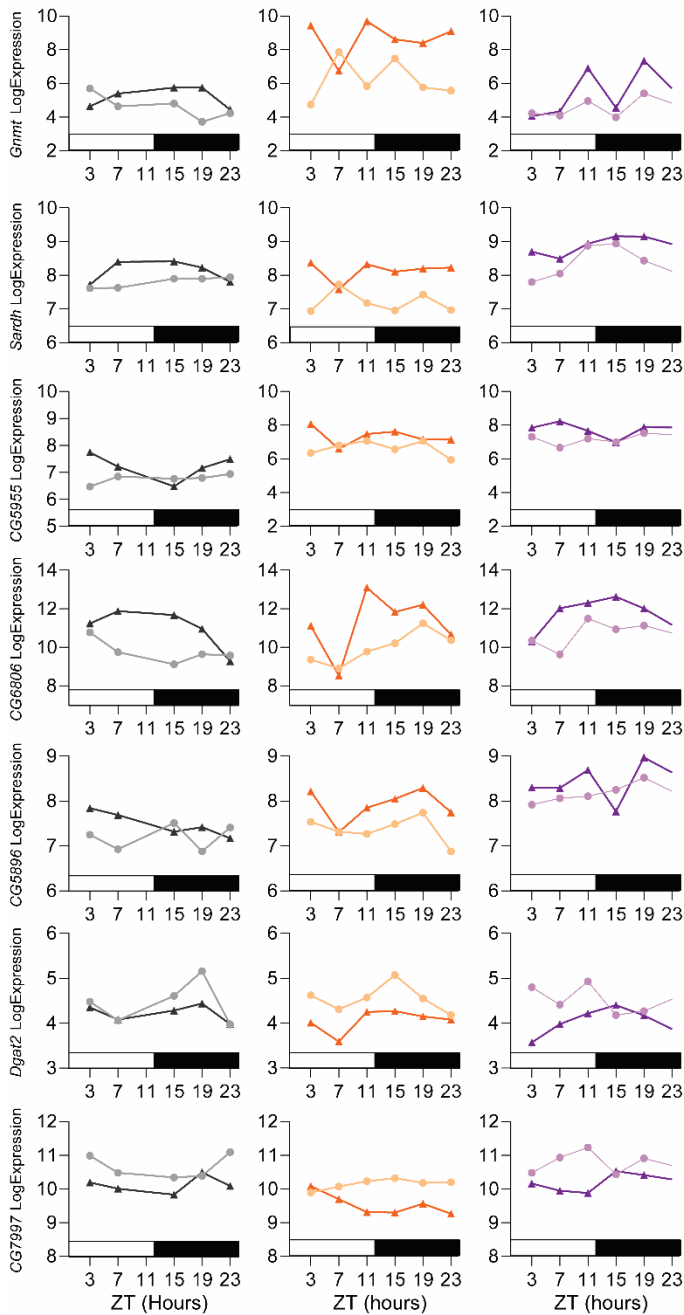

**c**

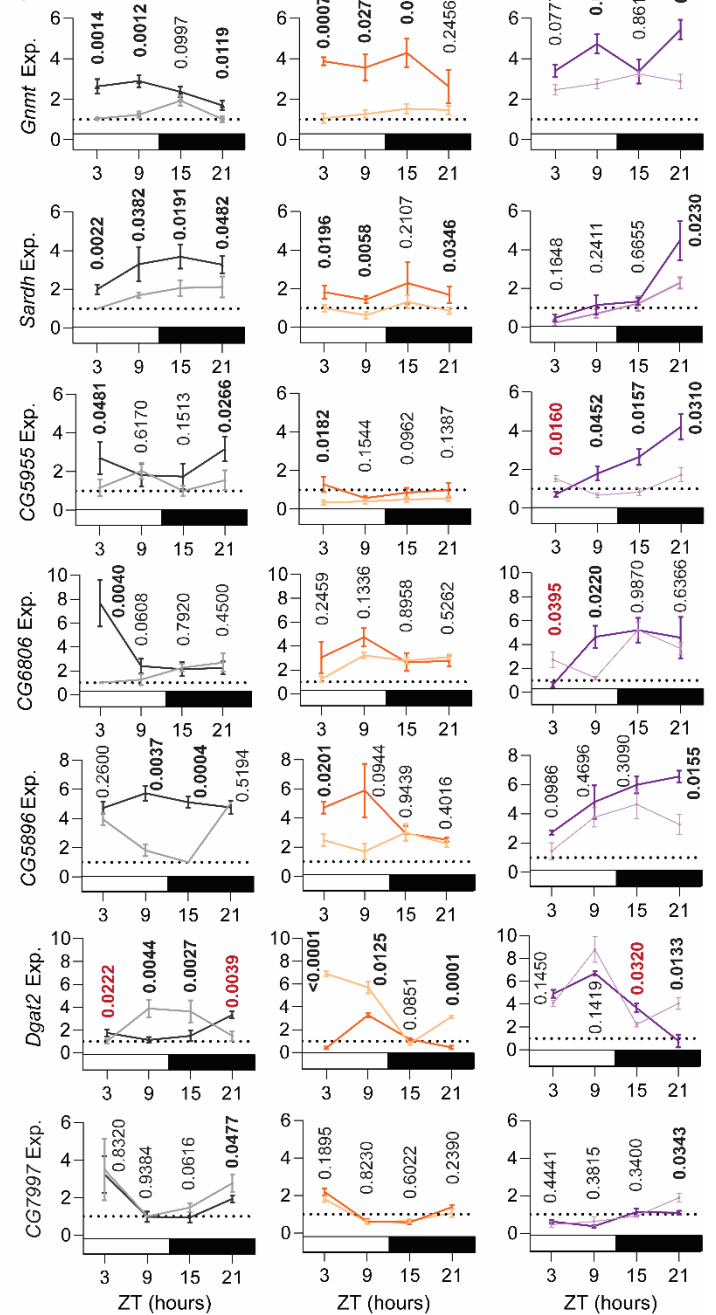

**Figure S2: Profiles of the significantly upregulated genes across WT, HFD, and *Sk2* models.**

(a) A table of differentially expressed genes shared across WT, HFD, and *Sk2* models.

(b) Temporal expression level of *Gnmt*, *Sardh*, *CG5955*, *CG6806*, *CG5896*, *CG7997*, and *Dgat2* under ALF and TRF in WT, HFD, and *Sk2* flies. Two outliers are removed.

(c) qPCR validation of temporal expression of *Gnmt*, *Sardh*, *CG5955*, *CG6806*, *CG5896*, *CG7997*, and *Dgat2* from IFMs under ALF and TRF in 3-week-old WT, HFD, and *Sk2* flies from independent experiments. The relative expression levels were normalized to the trough in WT-ALF. *CG13992* has low expression and cannot be detected robustly using qRT-PCR. N=3 biologically independent samples. Mean  $\pm$  SEM. Two-sided unpaired t-test. Black *p*-value indicates that the significant expression change is aligned with transcriptomic data (Supplementary Fig. 2b), otherwise labeled as red.

# Figure S3

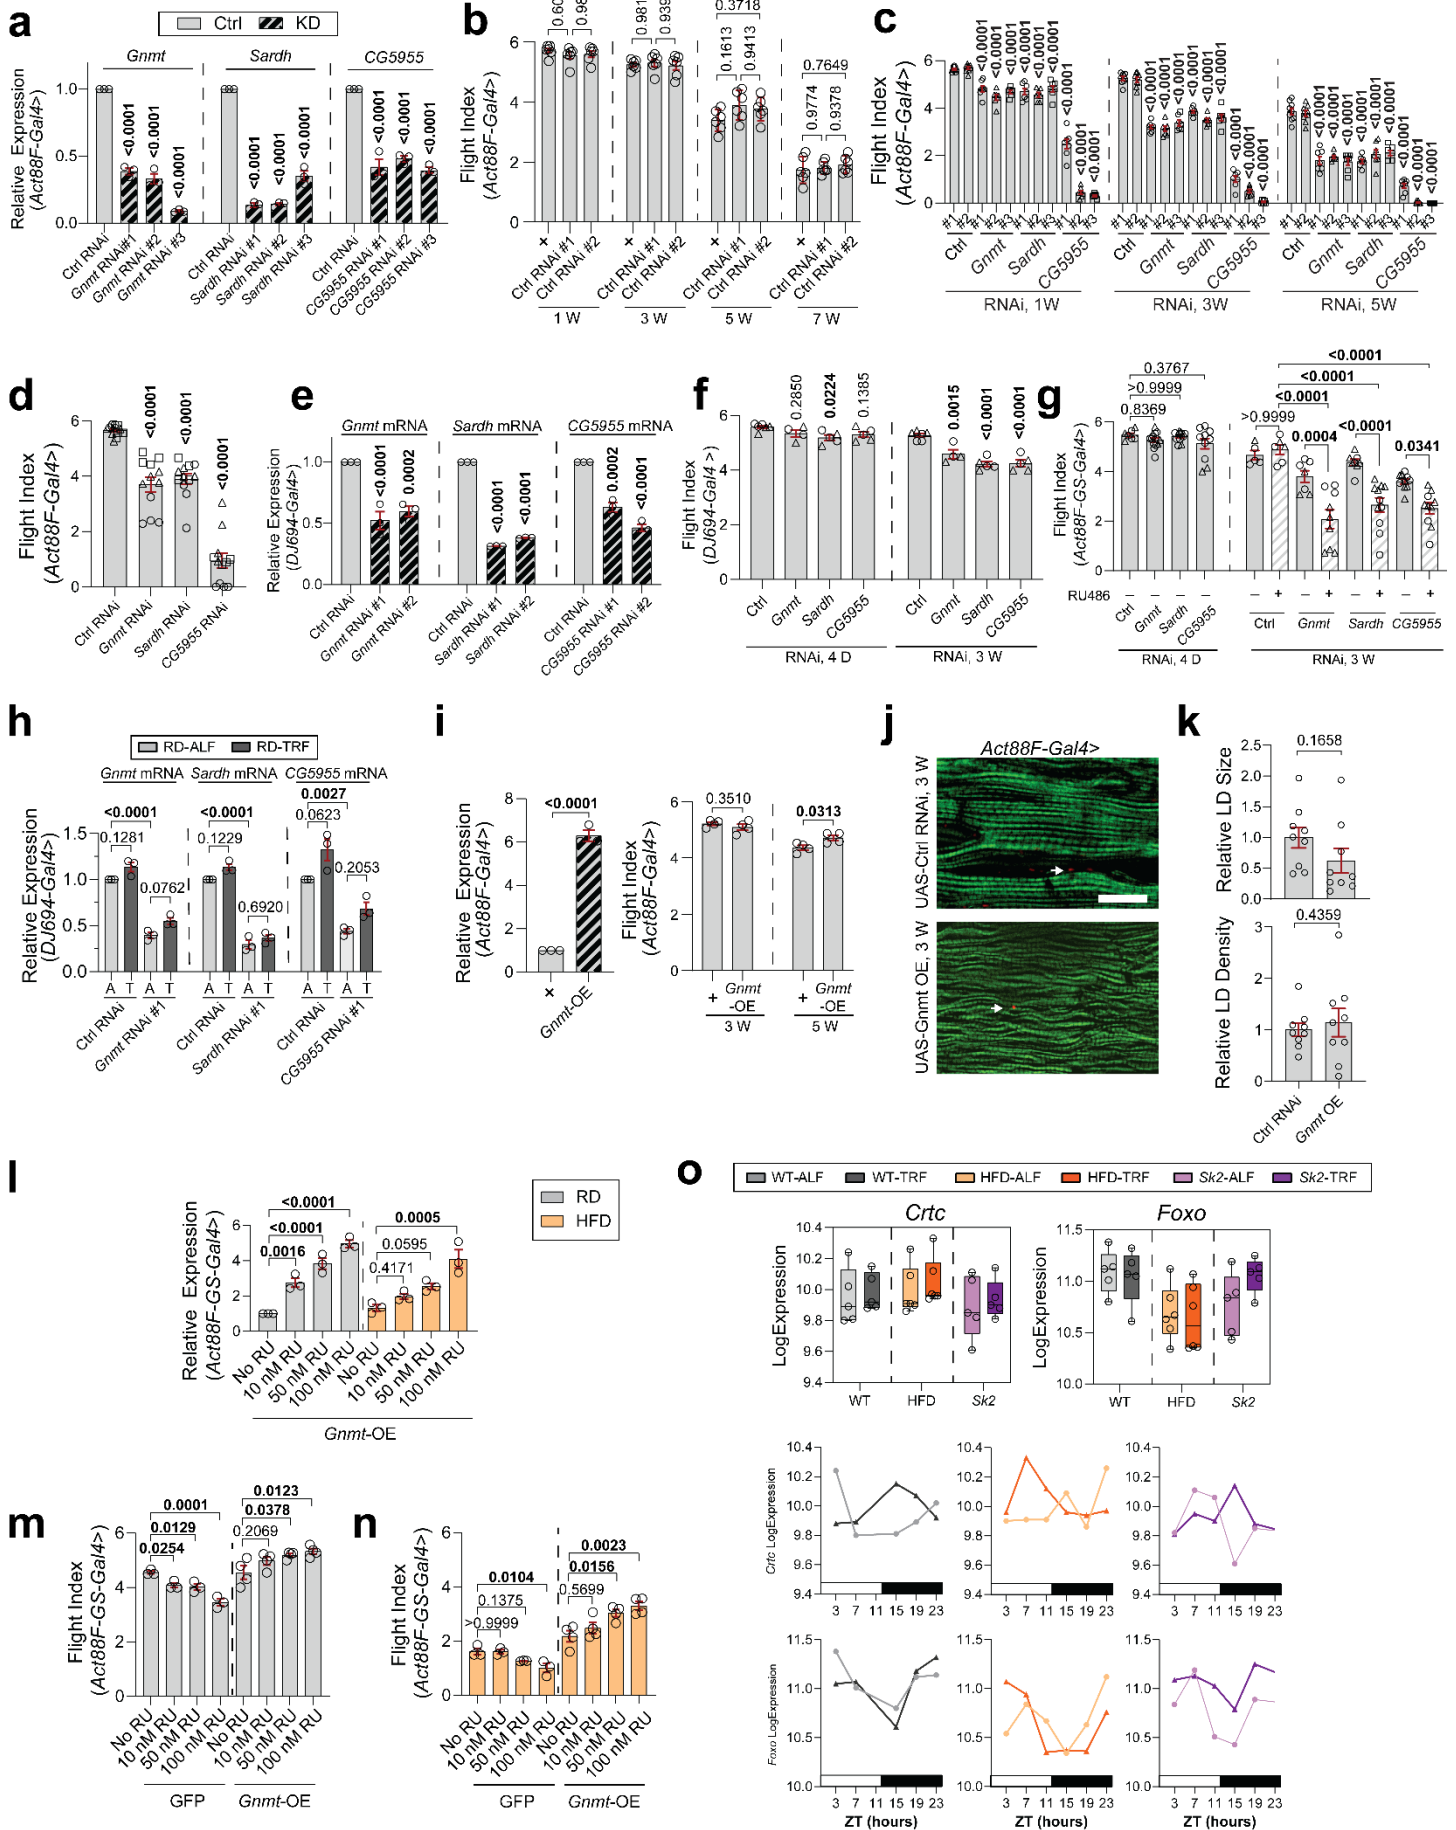

### Figure S3: Profiles of common upregulated genes and evaluation of potential transcription factors.

(a) Relative expression of *Gnmt*, *Sarah*, and *CG5955* in the corresponding KD driven by *Act88F* in 3-week-old female flies. Three independent RNAi lines were used. Quantifications were done by qRT-PCR. Mean  $\pm$  SEM is plotted for three technical replicates. Two independent experiments were performed with similar results, but one representative experiment is shown. One-way ANOVA with Sidak post hoc tests.

(b) Flight performance of *Act88F*+, *Act88F*>Ctrl RNAi #1 and *Act88F*>Ctrl RNAi#2 from 1, 3, 5, and 7-week-old female flies. Flight performance was comparable among controls. Flight indices were indicated as cohorts of 10-20 flies. # of cohorts per RNAi line per age group = 6; # of flies per RNAi line per age group = 76-102. Details of precise N are in Source Data. Mean  $\pm$ SEM. One-way ANOVA with Sidak post hoc tests.

(c) Flight performance of 1, 3, 5, and 7-week-old female flies with *Gnmt*, *Sardh*, and *CG5955* KD driven by *Act88F*. The data plotted as individual lines are identical to Fig. 2d. Flight Indices were plotted as cohorts of 10-20 flies. Results from independent RNAi lines were indicated with the symbol circle, triangle, or square. # of cohorts per RNAi line per age group = 7-9; # of flies per RNAi line per age group= 100-170. Details of precise N are in Source Data. Mean  $\pm$  SEM. One-way ANOVA with Sidak post hoc tests.

(d) Flight performance of 1-week-old male flies with *Gnmt*, *Sardh*, or *CG5955* KD driven by *Act88F*. Three independent RNAi lines per gene were tested. Flight indices were indicated as cohorts of 10-20 flies. Results from independent RNAi lines were indicated with the symbol circle, triangle, or square. # of cohorts per RNAi line per condition = 4; # of flies per genotype = 107-184. Details of precise N are in Source Data; Mean  $\pm$  SEM. One-way ANOVA with Sidak post hoc tests.

(e) Relative expression of *Gnmt*, *Sardh*, or *CG5955* in 3-week-old female flies with corresponding KD driven by *DJ694*. Two independent RNAi lines were used. Quantifications were done by qRT-PCR. Mean  $\pm$  SEM is plotted for three technical replicates. Two independent experiments were performed with similar results, but one representative experiment is shown. One-way ANOVA with Sidak post hoc tests.

(f) Flight performance of 4-day- and 3-week-old male flies with *Gnmt*, *Sardh*, or *CG5955* KD driven by *DJ694*. Two independent RNAi lines per gene were tested. Flight indices were indicated as cohorts of 10-20 flies. Results from independent RNAi lines were indicated with the symbol circle or triangle. # of cohorts per RNAi line per condition = 2-3; # of flies per genotype per age group = 73-117. Details of precise N are in Source Data. Mean  $\pm$  SEM. One-way ANOVA with Sidak post hoc tests.

(g) Flight performance of female flies with *Gnmt*, *Sardh*, or *CG5955* KD using *Act88F*-GS at 4 days and 3 weeks of age. RU486-induced (100nM) KD was started on day 4. Two independent RNAi lines per gene were tested each line is indicated by the symbol (circle and triangle). Flight indices were indicated as cohorts of 9-24 flies. # of cohorts per RNAi line per age group per condition= 2-4. # of flies per genotype per age group per condition = 86-171. Details of precise N are in Source Data. Mean  $\pm$  SEM. Two-way ANOVA with Sidak post hoc tests.

(h) Relative expression of *Gnmt*, *Sardh*, and *CG5955* in 3-week-old female ALF and TRF flies with corresponding KD by *DJ694*. Quantifications were done by qRT-PCR. Mean  $\pm$  SEM is plotted for three technical replicates. Two independent experiments were performed with similar results, but one representative experiment is shown. One-way ANOVA with Sidak post hoc tests.

(i) Relative expression of *Gnmt* (left panel) was tested in 3-week-old female flies and flight indices (right panel) of 3- and 5-week-old female flies with *Gnmt* overexpression driven by *Act88F*. Flight indices were indicated as cohorts of 10-20 flies. # of cohorts per genotype per age group = 4. # of flies per genotype per age group = 54-68. Details of precise N are in Source Data; Mean  $\pm$ SEM. Two-sided unpaired t-tests.

(j) Fluorescence images of the IFMs from 3-week-old females with *Gnmt* overexpression driven by *Act88F*. Phalloidin (green) and Nile Red (red puncta) staining compared with age-matched control. Mean  $\pm$  SEM. The scale bar is 20  $\mu$ m.

(k) Intramuscular lipid quantification of 3-week-old females (lipid droplet size and density) showed a significant reduction in lipid droplet size upon *Act88F*-driven overexpression of *Gnmt* compared to age-matched control. The control plotted here is the same control in Fig. 2f and 2g. Mean  $\pm$  SEM, N=9 from three flies' IFM per genotype. Two-sided unpaired t-tests.

(l) Relative expression of *Gnmt* in 3-week-old female flies with *Gnmt* overexpression using *Act88F*-GS driver. Experimental flies were fed with RD or HFD supplemented with titrated concentrations of RU486 (0, 10, 50 100nM). Mean  $\pm$  SEM is plotted for three technical replicates. Two independent experiments were performed with similar results, but one representative experiment is shown. One-way ANOVA with Sidak post hoc tests.

(m) Flight performance of *Act88F*-GS-driven *Gnmt* overexpression in 3-week-old female flies. Experimental flies were fed with RD supplemented with titrated concentrations of RU486 (0, 10, 50 100nM). Flight indices were indicated as cohorts of 10-20 flies. # of cohorts per condition = 3-4; # of flies per group = 30-73. Details of precise N are in Source Data. Mean  $\pm$  SEM. One-way ANOVA with Sidak post hoc tests.

(n) Flight performance of *Act88F-GS*-driven *Gnmt* overexpression in 3-week-old female flies. Experimental flies were fed with HFD supplemented with titrated concentrations of RU486 (0, 10, 50 100nM). Flight indices were indicated as cohorts of 10-20 flies. # of cohorts per condition = 3-4; # of flies per group = 41-74. Details of precise N are in Source Data. Mean  $\pm$  SEM. One-way ANOVA with Sidak post hoc tests.

(o) Expression level of gene *Crtc and Foxo* under ALF and TRF in WT and obese models. N = 5 time points in WT and *Sk2*. N = 6 time points in HFD. Source data are provided as a Source Data file.

# Figure S4

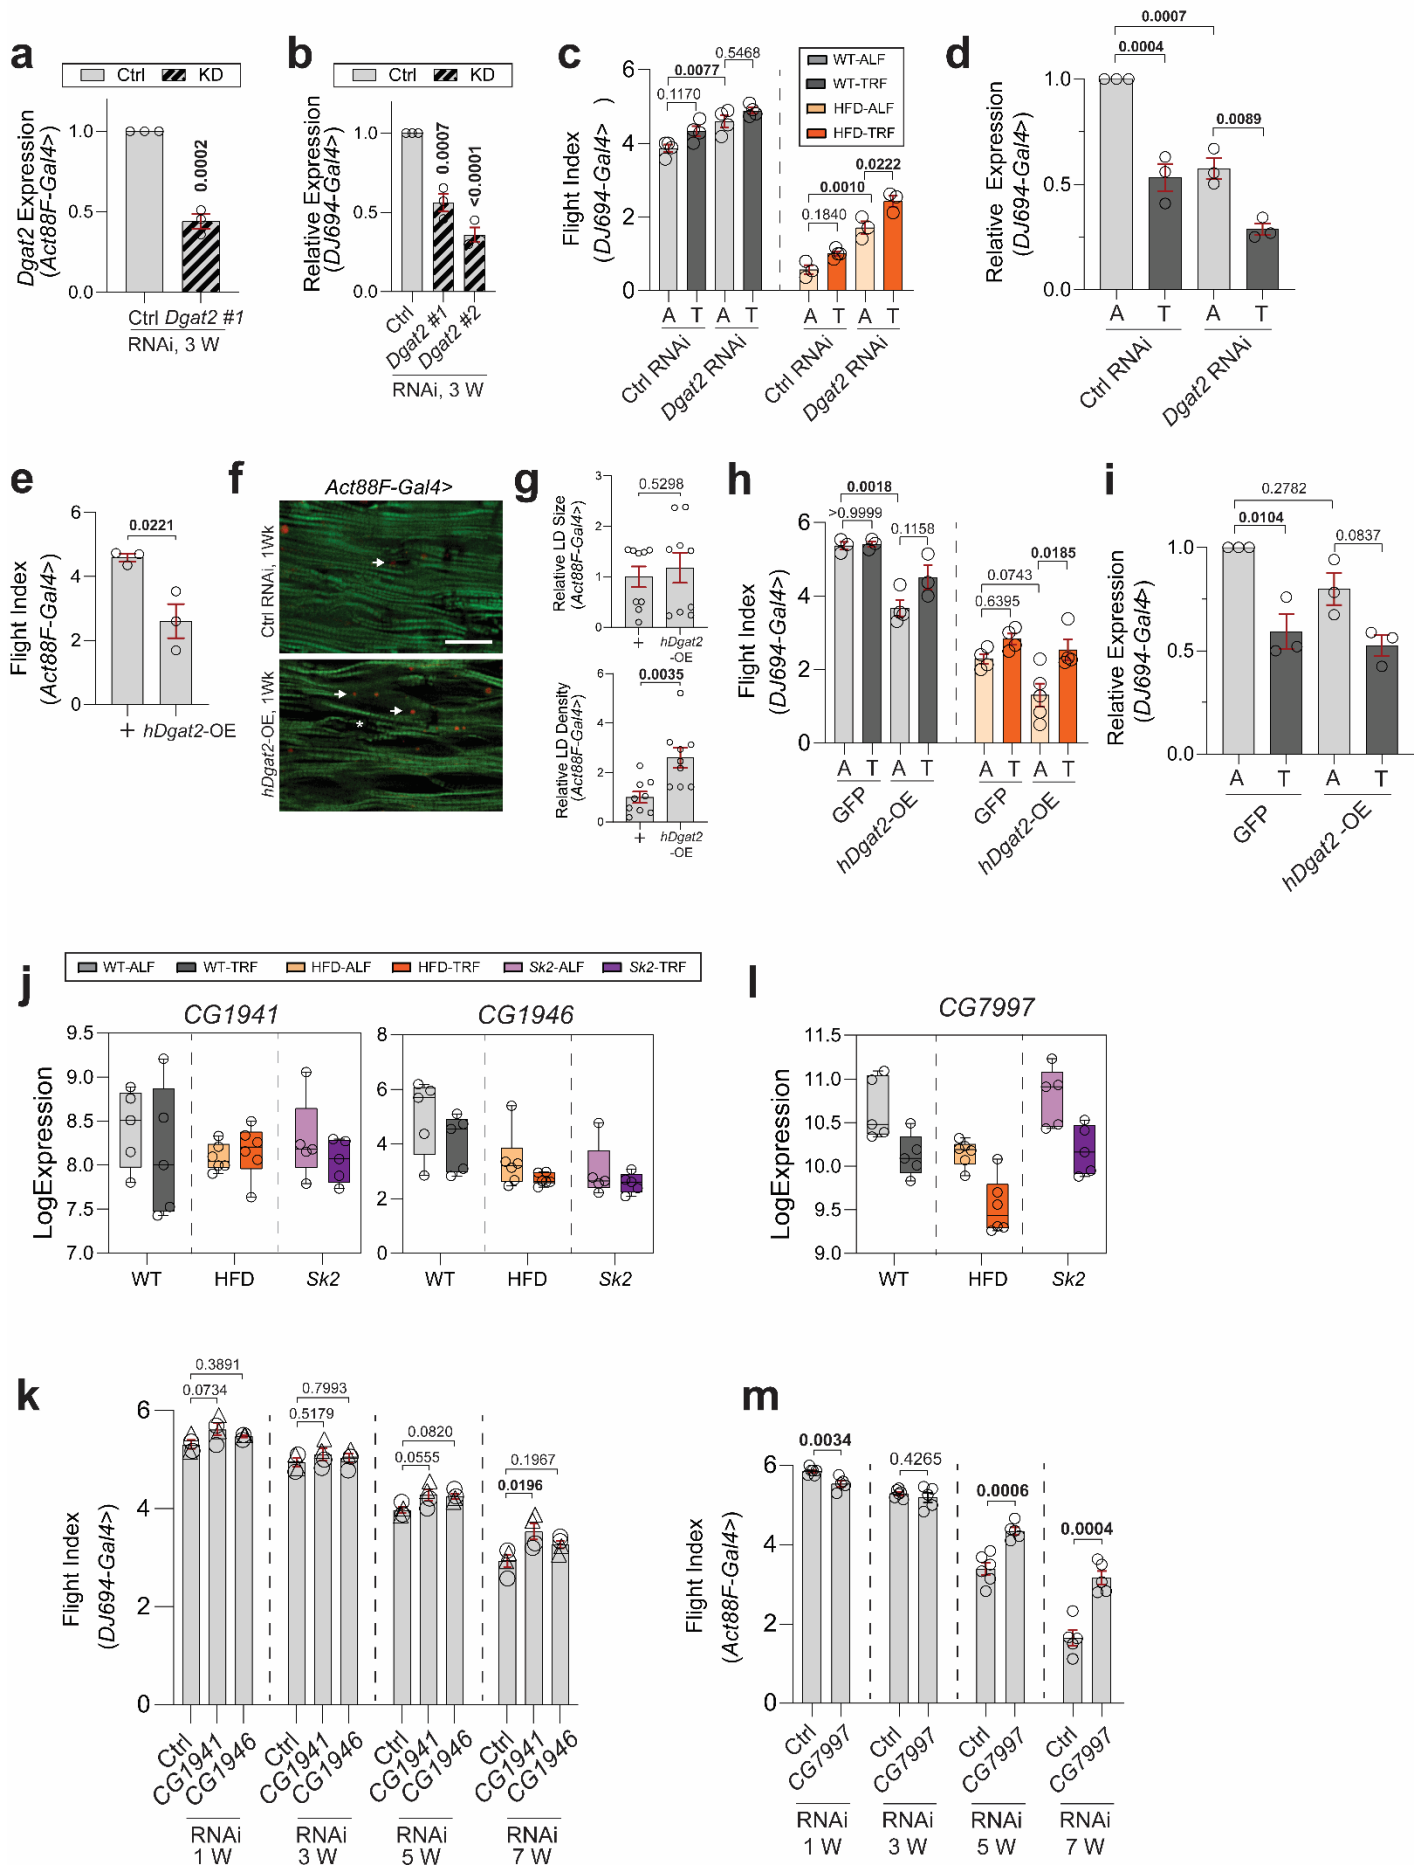



**Figure S4: Profiles of commonly downregulated genes across WT, HFD, and Sk2 models.**

- (a) Relative expression of *Dgat2* in 3-week-old female flies with *Act88F*-driven *Dgat2* KD. Quantifications were done by qRT-PCR. Mean  $\pm$  SEM is plotted for three technical replicates. Two independent experiments were performed with similar results, but one representative experiment is shown. Two-sided unpaired t-tests
- (b) Relative expression of *Dgat2* in 3-week-old female flies with *DJ694*-driven *Dgat2* KD were quantified with qRT-PCR. Mean  $\pm$  SEM is plotted for three technical replicates. Two independent experiments were performed with similar results, but one representative experiment is shown. One-way ANOVA with Sidak post hoc tests.
- (c) Flight performance of 5-week-old female flies upon *DJ694*-driven *Dgat2* KD under ALF and TRF in RD or HFD. Flight indices were indicated as cohorts of 10-20 flies. # of cohorts per genotype per condition = 3-4. # of flies per genotype = 32-55. Details of precise N are in Source Data. Mean  $\pm$ SEM. Two-way ANOVA with Sidak post hoc tests.
- (d) Relative expression of *Dgat2* in 3-week-old female flies upon *DJ694*-driven *Dgat2* KD under ALF and TRF. Mean  $\pm$  SEM is plotted for three technical replicates. Two independent experiments were performed with similar results, but one representative experiment is shown. Two-way ANOVA with Sidak post hoc tests.
- (e) Flight performance of 3-week-old female flies with *hDgat2* overexpression using *Act88F* driver. Flight indices were indicated as cohorts of 10-20 flies. # of cohorts per genotype = 3. # of flies per genotype = 46-56. Details of precise N are in Source Data. Mean  $\pm$ SEM. Two-sided unpaired t-tests.
- (f) Fluorescence images of IFMs from 1-week-old females with *Act88F*-driven *hDgat2* overexpression upon staining with phalloidin (green) and Nile Red (red puncta) compared with age-matched control. The scale bar is 20  $\mu$ m.
- (g) Intramuscular lipid quantification of 1-week-old females (lipid size and density) showed a significant reduction in lipid droplet size upon *Act88F*-driven *hDgat2* overexpression compared to age-matched control. N = 9 from three flies' IFM per genotype. Mean  $\pm$ SEM. Two-sided unpaired t-tests.
- (h) Flight performance of 3-week-old female flies upon *DJ694*-driven *hDgat2* OE under ALF and TRF in RD or HFD. Flight indices were indicated as cohorts of 10-20 flies. # of cohorts per genotype per condition = 3-5. # of flies per genotype = 39-77. Details of precise N are in Source Data. Mean  $\pm$ SEM. Two-way ANOVA with Sidak post hoc tests.
- (i) Relative expression of *Dgat2* in 3-week-old female flies upon *DJ694*-driven *hDgat2* OE under ALF and TRF. Mean  $\pm$  SEM is plotted for three biologically independent replicates. Two independent experiments were performed with similar results, but one representative experiment is shown. Two-way ANOVA with Sidak post hoc tests.
- (j) Expression level of *Dgat2* predicted paralogs *CG1941* and *CG1946* under ALF and TRF in WT and obese models. N = 5 time points in WT and Sk2. N = 6 time points in HFD.
- (k) Flight performance of 1-, 3-, 5-, and 7-week-old female flies with *DJ694*-driven KD of *Dgat2* predicted paralogs *CG1941* and *CG1946*. Two independent RNAi lines per gene were tested. Flight indices were indicated as cohorts of 10-20 flies. Results from independent RNAi lines were indicated with the symbol circle or triangle. # of cohorts per RNAi line per age group = 3; # of flies per genotype per age = 63-80. Details of precise N are in Source Data. Mean  $\pm$ SEM. One-way ANOVA with Sidak post hoc tests.
- (l) Expression level of *CG7997* under ALF and TRF in WT and obese models. N = 5 time points in WT and Sk2. N = 6 time points in HFD.
- (m) Flight performance of 1-, 3-, 5-, and 7-week-old female flies with *DJ694*-driven *CG7997* KD. One RNAi line was used. Flight indices were indicated as cohorts of 10-20 flies. # of cohorts per genotype per age group = 5-6; # of flies per genotype per age = 69-102. Details of precise N are in Source Data. Mean  $\pm$ SEM. Two-sided unpaired t-tests. Source data are provided as a Source Data file.

# Figure S5

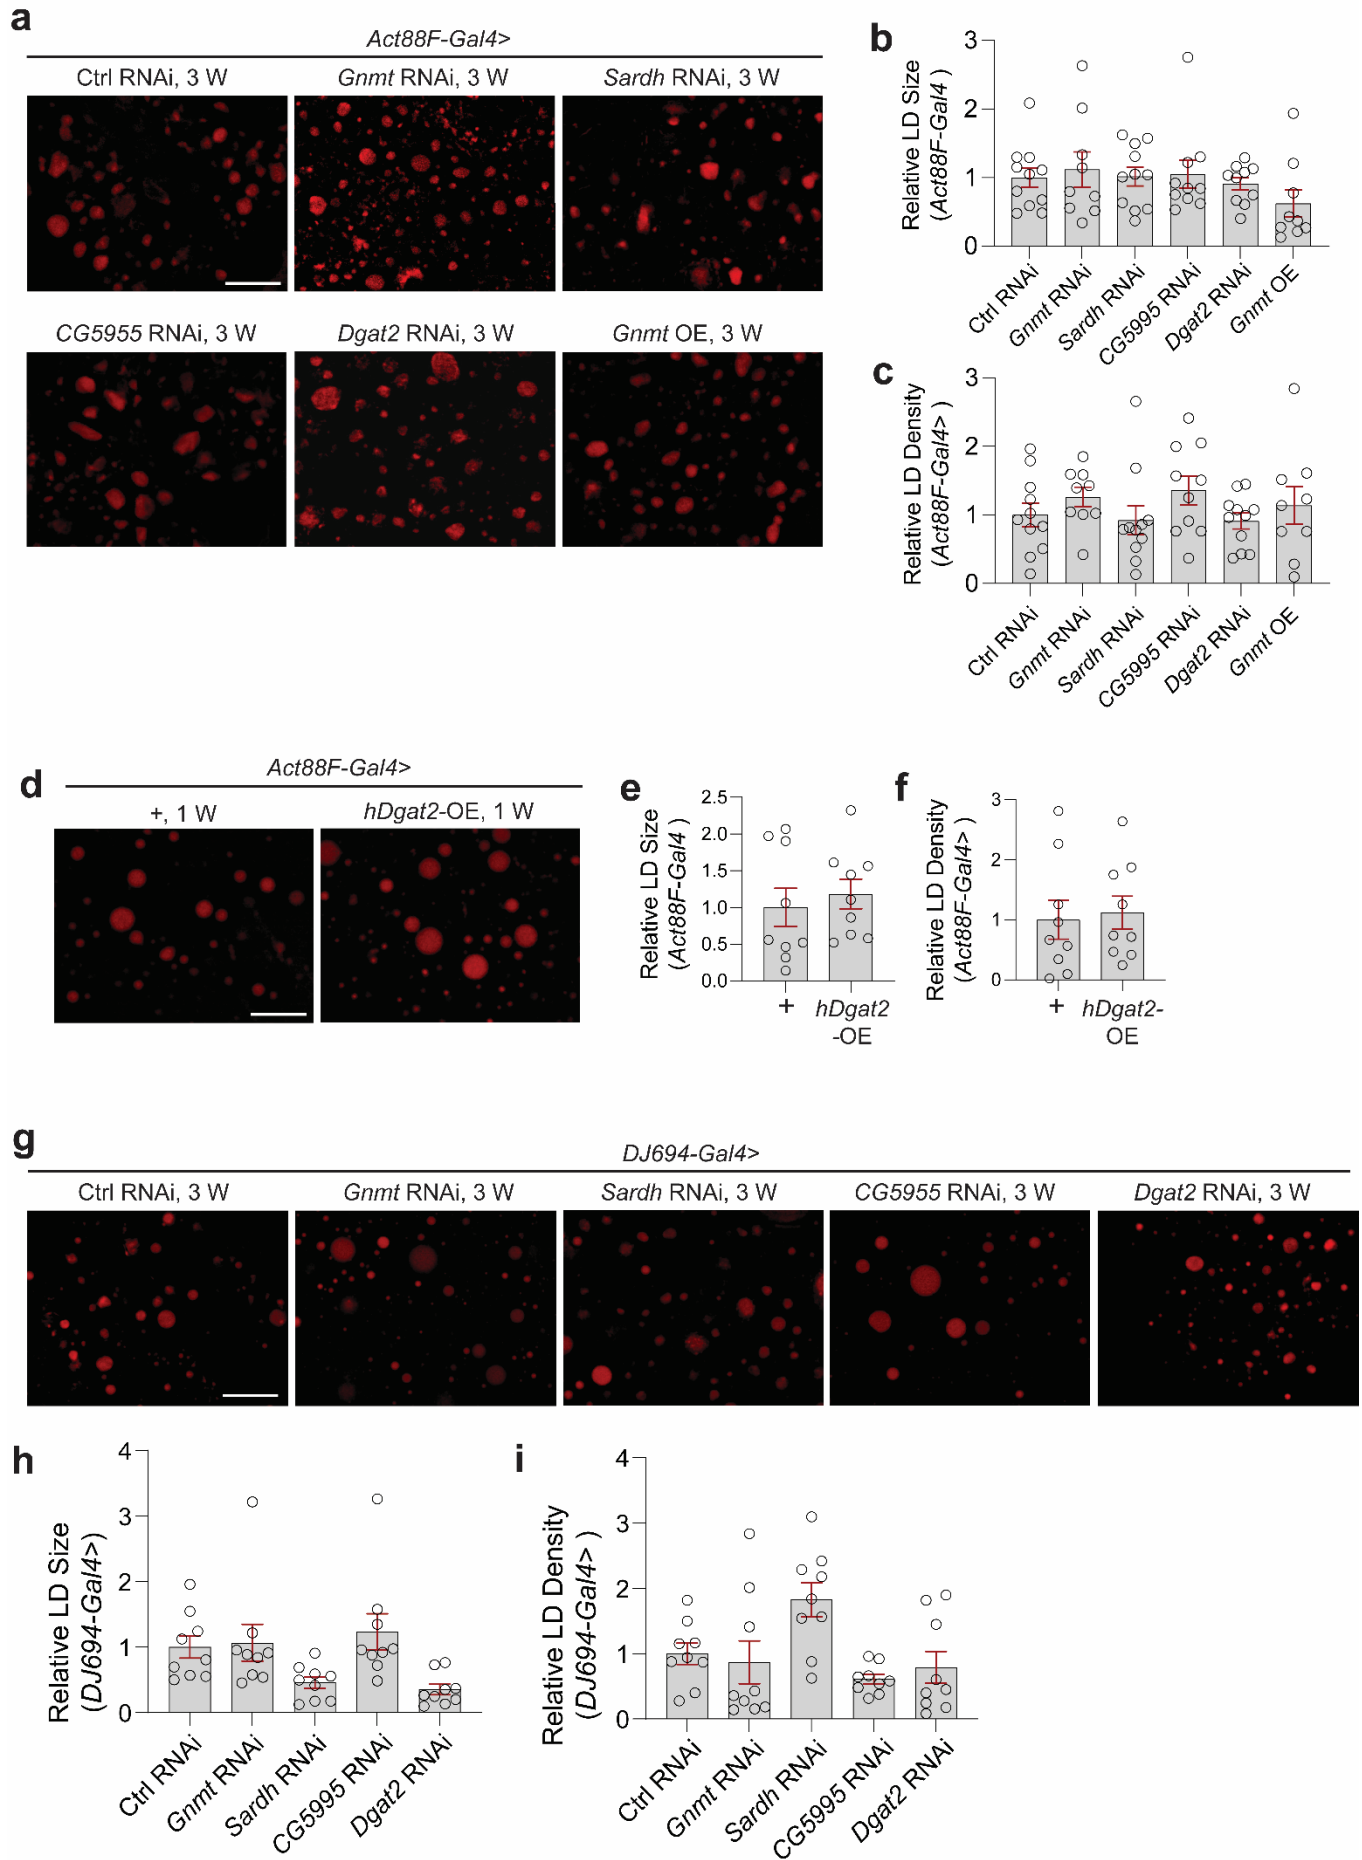

**Figure S5: Fluorescence images of abdomen fat body of flies with knockdown or overexpression of common DEGs.**

(a) Fluorescence images of the abdomen from 3-week-old females with *Act88F*-driven KD of *Gnmt*, *Sardh*, *CG5955*, and *Dgat2*, in addition to *Gnmt* overexpression upon probing with Nile Red (red puncta). The scale bar is 20  $\mu\text{m}$ .

(b-c) Lipid quantification (lipid droplet size (b) and density (c)) showed no significant differences in lipid droplet size upon *Act88F*-driven KD of *Gnmt*, *Sardh*, *CG5955*, and *Dgat2* compared to age-matched control. In addition, no significant differences in lipid droplet size upon *Act88F*-driven *Gnmt* overexpression compared to age-matched control. N = 9 from three flies' IFM per genotype. Mean  $\pm$  SEM. One-way ANOVA with Sidak post hoc tests.

(d) Fluorescence image of the abdomen from 1-week-old females with *Act88F*-driven overexpression of *hDgat2*. The scale bar is 20  $\mu\text{m}$ .

(e-f) Lipid quantification (lipid droplet size (e) and density (f)) showed no significant differences in lipid droplet size upon *Act88F*-driven *hDgat2* overexpression compared to age-matched control. N = 9 from three flies' IFM per genotype. Mean  $\pm$  SEM. Two-sided unpaired t-tests.

(g) Fluorescence images of the abdomen from 3-week-old females with *DJ694*-driven KD of *Gnmt*, *Sardh*, *CG5955*, and *Dgat2* upon probing with Nile Red (red puncta). The scale bar is 20  $\mu\text{m}$ .

(h-i) Lipid quantification (lipid droplet size (h) and density (i)) showed no significant differences in lipid droplet size upon *DJ694*-driven KD of *Gnmt*, *Sardh*, *CG5955* and *Dgat2* compared to age-matched control. N = 9 from three flies' IFM per genotype. Mean  $\pm$  SEM. One-way ANOVA with Sidak post hoc tests. Source data are provided as a Source Data file.

# Figure S6

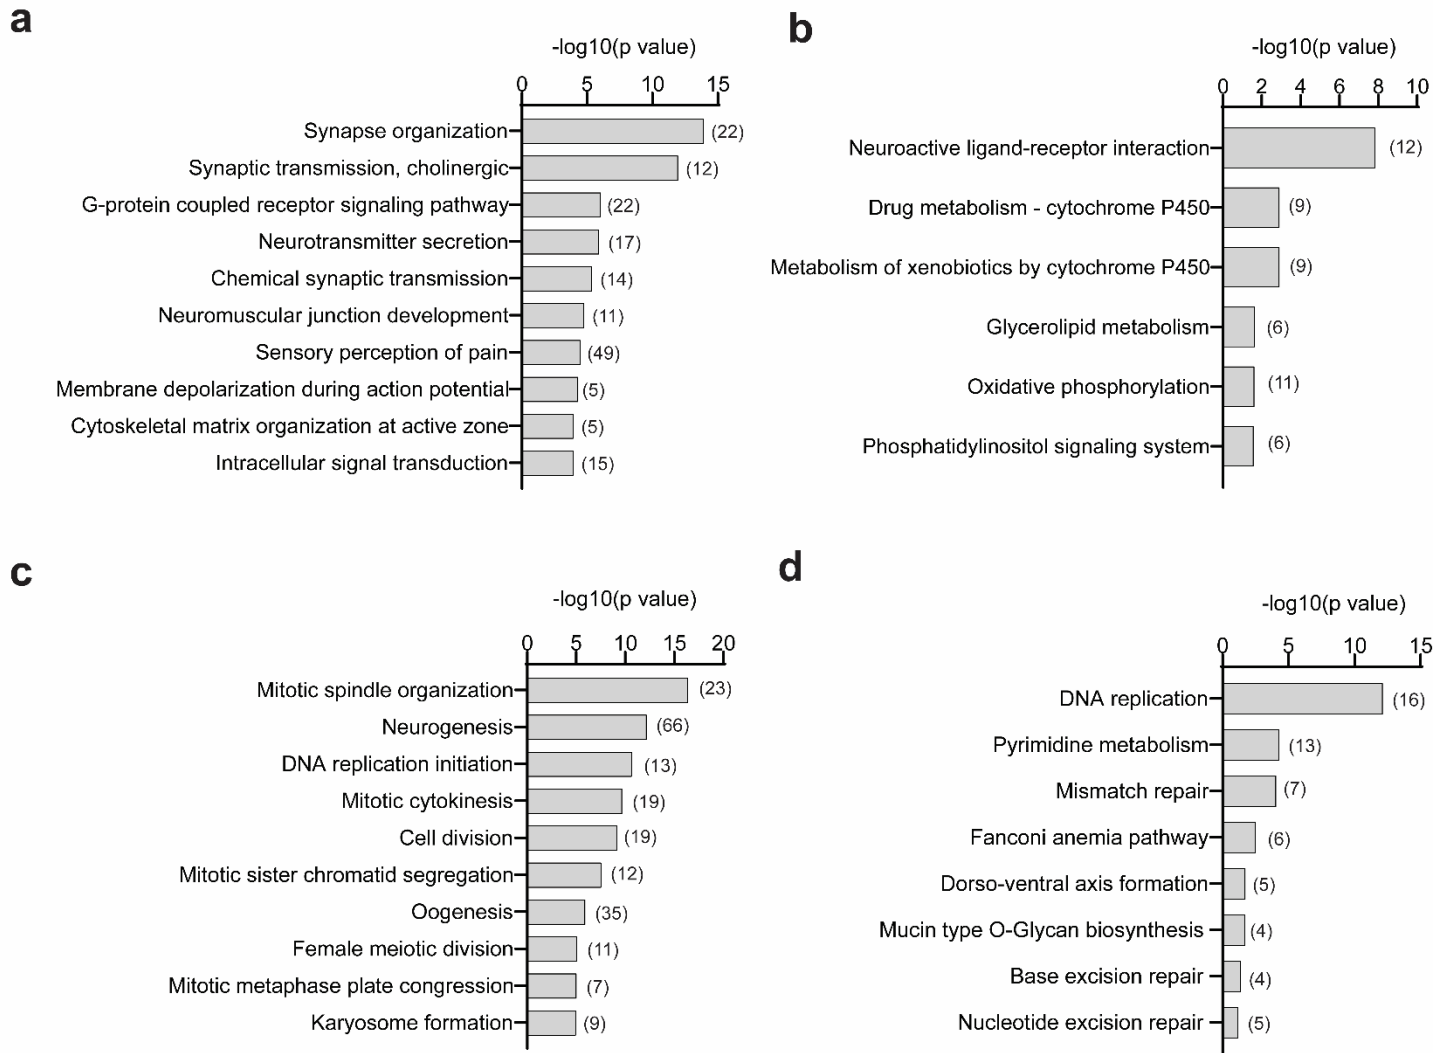

**Figure S6: GO and Reactome analyses of significantly downregulated genes under TRF versus ALF in obesity models.**

(a-b) GO analysis (a) and Reactome pathway analysis (b) of 636 genes that were significantly downregulated under TRF in the HFD model. Bar charts represent the  $-\text{Log}_{10}(p\text{-value})$  of each enriched GO term and pathway. The number of genes identified in each GO term and pathway is shown in parentheses. No adjustments for multiple comparisons.

(c-d) GO analysis (c) and Reactome pathway analysis (d) of 579 genes that were significantly downregulated under TRF in the *Sk2* model. Bar charts represent the  $-\text{Log}_{10}(p\text{-value})$  of each enriched GO term and pathway. The number of genes identified in each GO term and pathway is shown in parentheses. No adjustments for multiple comparisons.

**Figure S7**

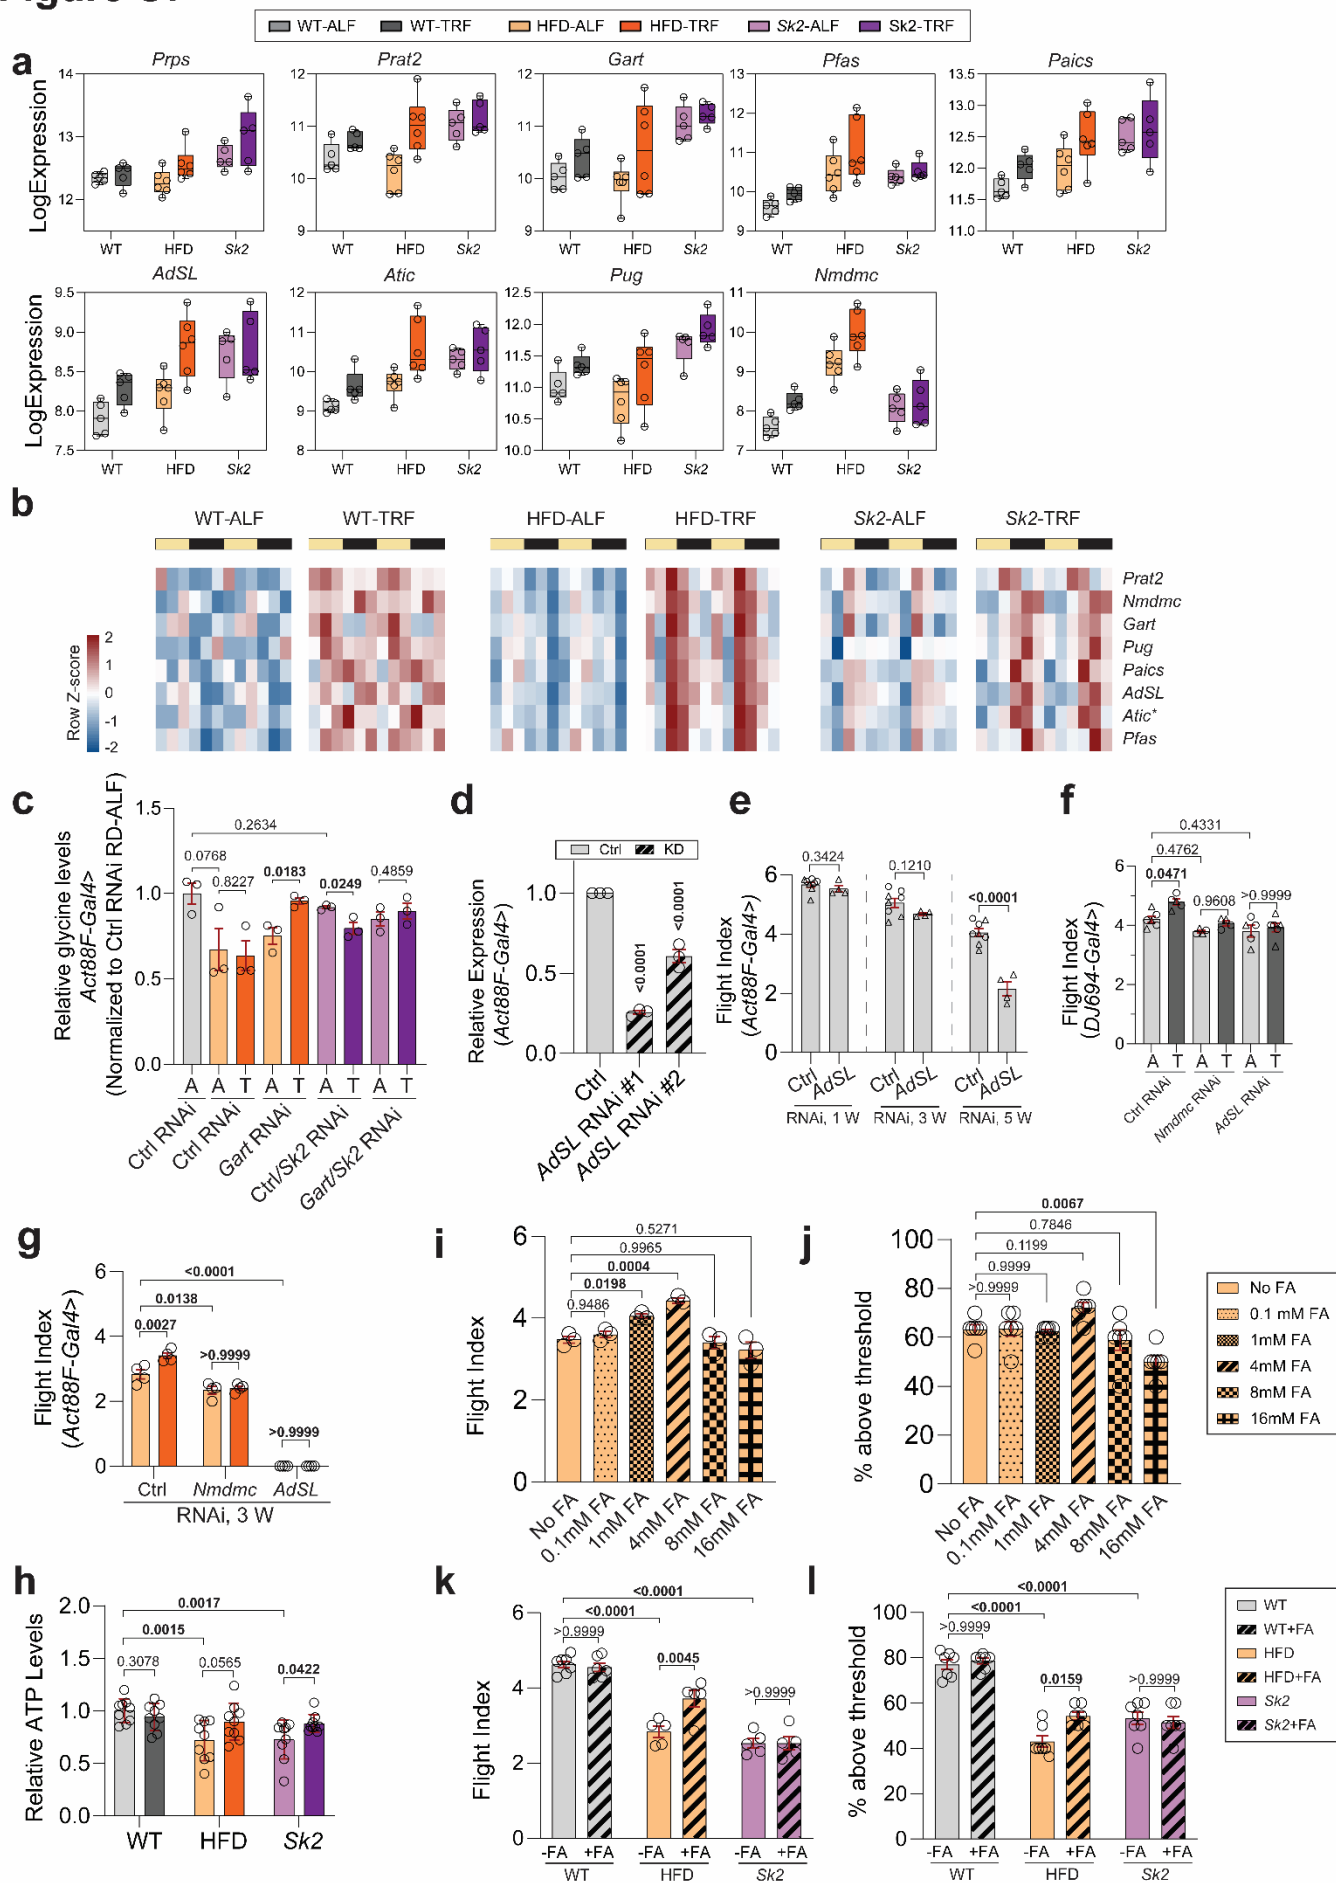

**Figure S7: Purine cycle genes under ALF and TRF in WT, HFD, and *Sk2* models.**

(a) Expression levels of genes that are significantly upregulated under HFD-TRF versus HFD-ALF. N = 5 time points in WT and *Sk2*. N = 6 time points in HFD.

(b) Heatmap representation of rhythmic genes associated with purine cycle under HFD-TRF. Asterisks indicate genes that were unrhythmic under HFD-ALF but gained rhythmicity under HFD-TRF.

(c) Relative glycine levels of 3-week-old female flies with indicated genotypes under different diet regimens. N = three biologically independent replicates. Mean  $\pm$  SEM. Two-sided unpaired t-tests.

(d) Relative expression of *AdSL* in 3-week-old female flies *Act88F*-driven *AdSL* KD with two independent RNAi lines were quantified with qRT-PCR. Mean  $\pm$  SEM is plotted for three technical replicates. Two independent experiments were performed with similar results, but one representative experiment is shown. One-way ANOVA with Sidak post hoc tests.

(e) Flight performance of female flies with *AdSL* KD using *Act88F* and *UAS-AdSL* RNAi #2 at 1, 3, and 5 weeks of age. Data from two independent *AdSL* RNAi lines were plotted separately due to varying severity of phenotype and different KD efficiency. The control data here are the same as shown in Fig. 5e. Flight indices were indicated as cohorts of 10-20 flies. # of cohorts per genotype per age group = 4; # of flies per genotype per age = 51-143. Details of precise N are in Source Data. Mean  $\pm$  SEM. Two-sided unpaired t-tests.

(f) Flight performance of 5-week-old female flies with *DJ694*-driven KD of *Nmdmc* and *AdSL* under RD-ALF and RD-TRF. Flight indices were indicated as cohorts of 10-20 flies. # of cohorts per genotype = 4-6; # of flies per genotype per condition = 54-84. Details of precise N are in Source Data. Mean  $\pm$  SEM. Two-sided unpaired t-tests.

(g) Flight performance of 3-week-old female flies with *Act88F*-driven KD of *Nmdmc* and *AdSL* under HFD-ALF and HFD-TRF. N# = 30-50 females for each condition. Flight indices were indicated as cohorts of 10-20 flies. # of cohorts per genotype per age group = 4. # of flies per genotype per condition = 53-64. Details of precise N are in Source Data. Mean  $\pm$  SEM. Two-sided unpaired t-tests.

(h) Relative ATP levels of 3-week-old WT, HFD, and *Sk2* flies under ALF and TRF. N = 9 biologically independent replicates. Mean  $\pm$  SEM. Two-way ANOVA with Sidak post hoc tests.

(i) Flight performance of 10-day-old HFD-ALF female flies fed with food supplemented with 0.1 mM, 1 mM, 4 mM, 8 mM, and 16 mM folic acid (FA). Flight indices were indicated as cohorts of 10-20 flies. # of cohorts per condition = 3. # of flies per condition = 42-53. Details of precise N are in Source Data. Mean  $\pm$  SEM. One-way ANOVA with Sidak post hoc tests.

(j) Climbing performance of 10-day-old HFD-ALF female flies fed with food supplemented with 0.1 mM, 1 mM, 4 mM, 8 mM, and 16 mM folic acid (FA). The climbing performance was indicated as cohorts of 10-13 flies. # of cohorts per condition = 6. # of flies per condition = 60-65. Details of precise N are in Source Data. Mean  $\pm$  SEM. One-way ANOVA with Sidak post hoc tests.

(k) Flight performance of 3-week-old WT, HFD, and *Sk2* female flies with or without folic acid supplement. Flight indices were indicated as cohorts of 10-20 flies. # of cohorts per condition = 5-7; # of flies per condition = 64-111. Details of precise N are in Source Data. Mean  $\pm$  SEM. One-way ANOVA with Sidak post hoc tests.

(l) Climbing performance of 3-week-old WT, HFD, and *Sk2* female flies with or without folic acid supplement. Climbing performance was indicated as cohorts of 10-13 flies. # of cohorts per condition = 7. # of flies per condition = 70-81. Details of precise N are in Source Data. Mean  $\pm$  SEM. One-way ANOVA with Sidak post hoc tests. Source data are provided as a Source Data file.

# Figure S8

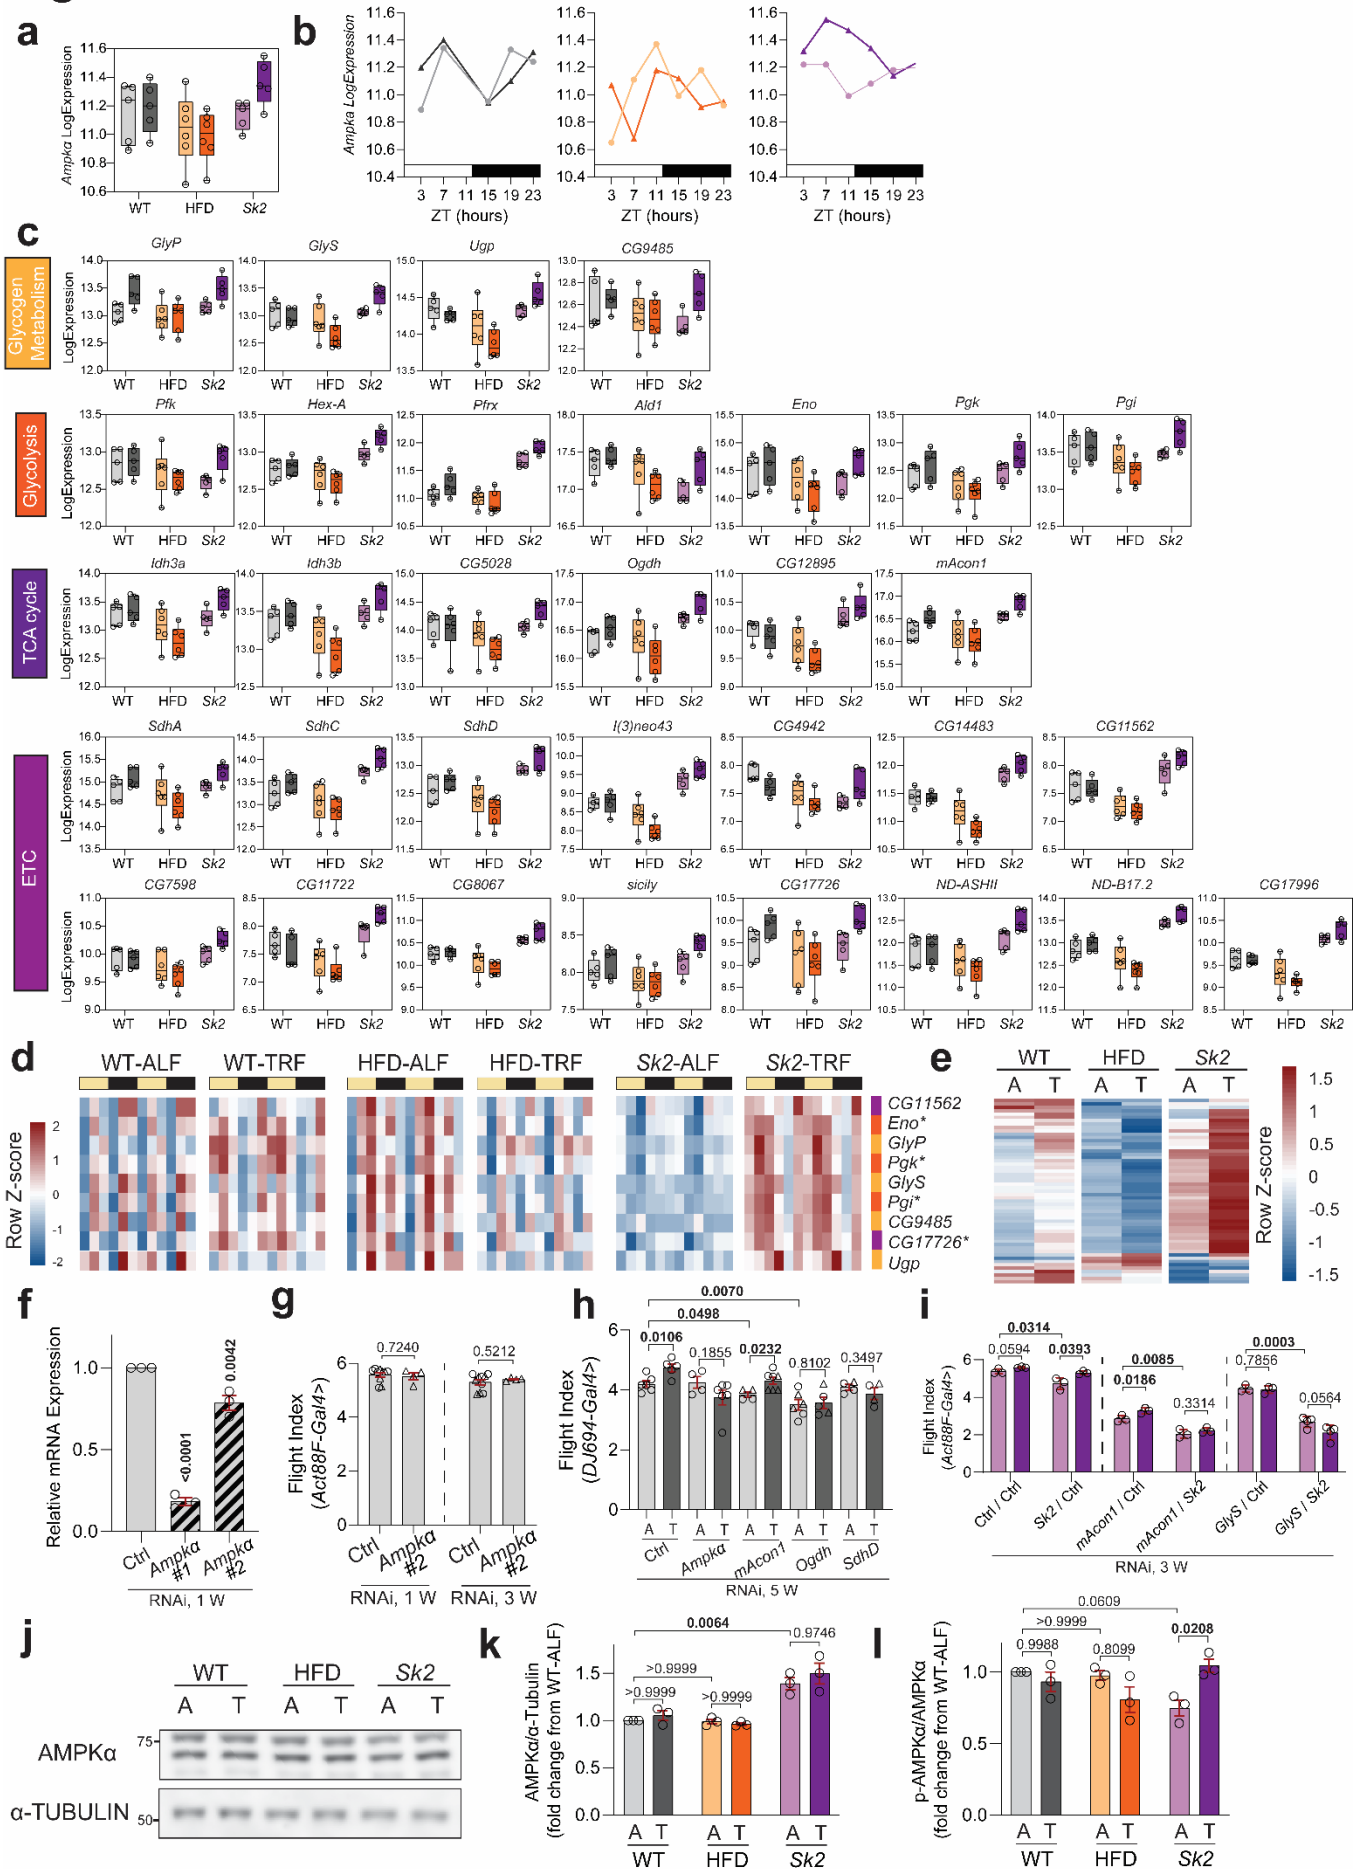

**Figure S8: TRF induces activation of AMPK $\alpha$  associated pathways in *Sk2* flies.**

- (a) Expression levels of *Ampka* in WT, HFD, and *Sk2* flies under ALF and TRF. N = 5 time points in WT and *Sk2*. N = 6 time points in HFD.
- (b) Expression level of *Ampka* at each time point.
- (c) Expression levels of genes from Fig. 5c in WT, HFD, and *Sk2* flies under ALF and TRF. N = 5 time points in WT and *Sk2*. N = 6 time points in HFD.
- (d) Heatmap representation of the expression levels of rhythmic genes associated with AMPK signaling pathways under *Sk2*-TRF. Asterisks indicate genes that were unrhythmic under *Sk2*-ALF but gained rhythmicity under *Sk2*-TRF.
- (e) Heatmap representation of the average expression levels of genes related to glycolysis, glycogen metabolism, TCA cycle, and, ETC with increased but not statistically significant under TRF versus ALF in the *Sk2* flies.
- (f) Relative mRNA expressions of *Act88F*-driven *Ampka* KD with two independent RNAi lines in 1-week-old female flies were quantified with qRT-PCR. Mean  $\pm$  SEM is plotted for three technical replicates. Two independent experiments were performed with similar results, but one representative experiment is shown. One-way ANOVA with Sidak post hoc tests.
- (g) Flight performance of *Ampka* KD using *Act88F-Gal4* and *UAS-Ampka* RNAi #2 at 1 and 3 weeks of age in female flies. Data from two independent *Ampka* RNAi lines were plotted separately due to varying severity of phenotypes and different KD efficiency. The control data here are the same as shown in Fig. 6e. Flight indices were indicated as cohorts of 10-20 flies. # of cohorts per condition= 4-5; # of flies per genotype = 64-131. Details of precise N are in Source Data. Mean  $\pm$  SEM. Two-sided unpaired t-tests.
- (h) Flight performance of 5-week-old female flies with *DJ694*-driven KD of *Ampka*, *mAcon1*, *Ogdh*, and *SdhD* under RD-ALF and RD-TRF. The control data is identical to Supplementary Fig. 7f. Flight indices were indicated as cohorts of 10-20 flies. # of cohorts per condition= 4-7; # of flies per genotype = 49-86. Details of precise N are in Source Data. Mean  $\pm$  SEM. Two-sided unpaired t-tests.
- (i) Flight index of 3-week-old flies with indicated genotypes (KD driven by *Act88F*) under ALF and TRF. Flight indices were indicated as cohorts of 10-20 flies. # of cohorts per condition= 3-4; # of flies per genotype = 34-54. Details of precise N are in Source Data. Mean  $\pm$  SEM. Two-sided unpaired t-tests.
- (j) Representative western blot of AMPK $\alpha$  levels (top) and  $\alpha$ -TUBULIN (bottom), from 3-week-old female fly IFMs in WT, HFD, and *Sk2* flies under ALF (A) and TRF (T).
- (k-l) Ratios of AMPK $\alpha$ / $\alpha$ -TUBULIN (j) and p-AMPK $\alpha$ /AMPK $\alpha$ (h) normalized to WT-ALF. N = 3 biologically independent replicates. Mean  $\pm$  SEM. Two-way ANOVA with Sidak post hoc tests. Source data are provided as a Source Data file.



# Figure S9

a

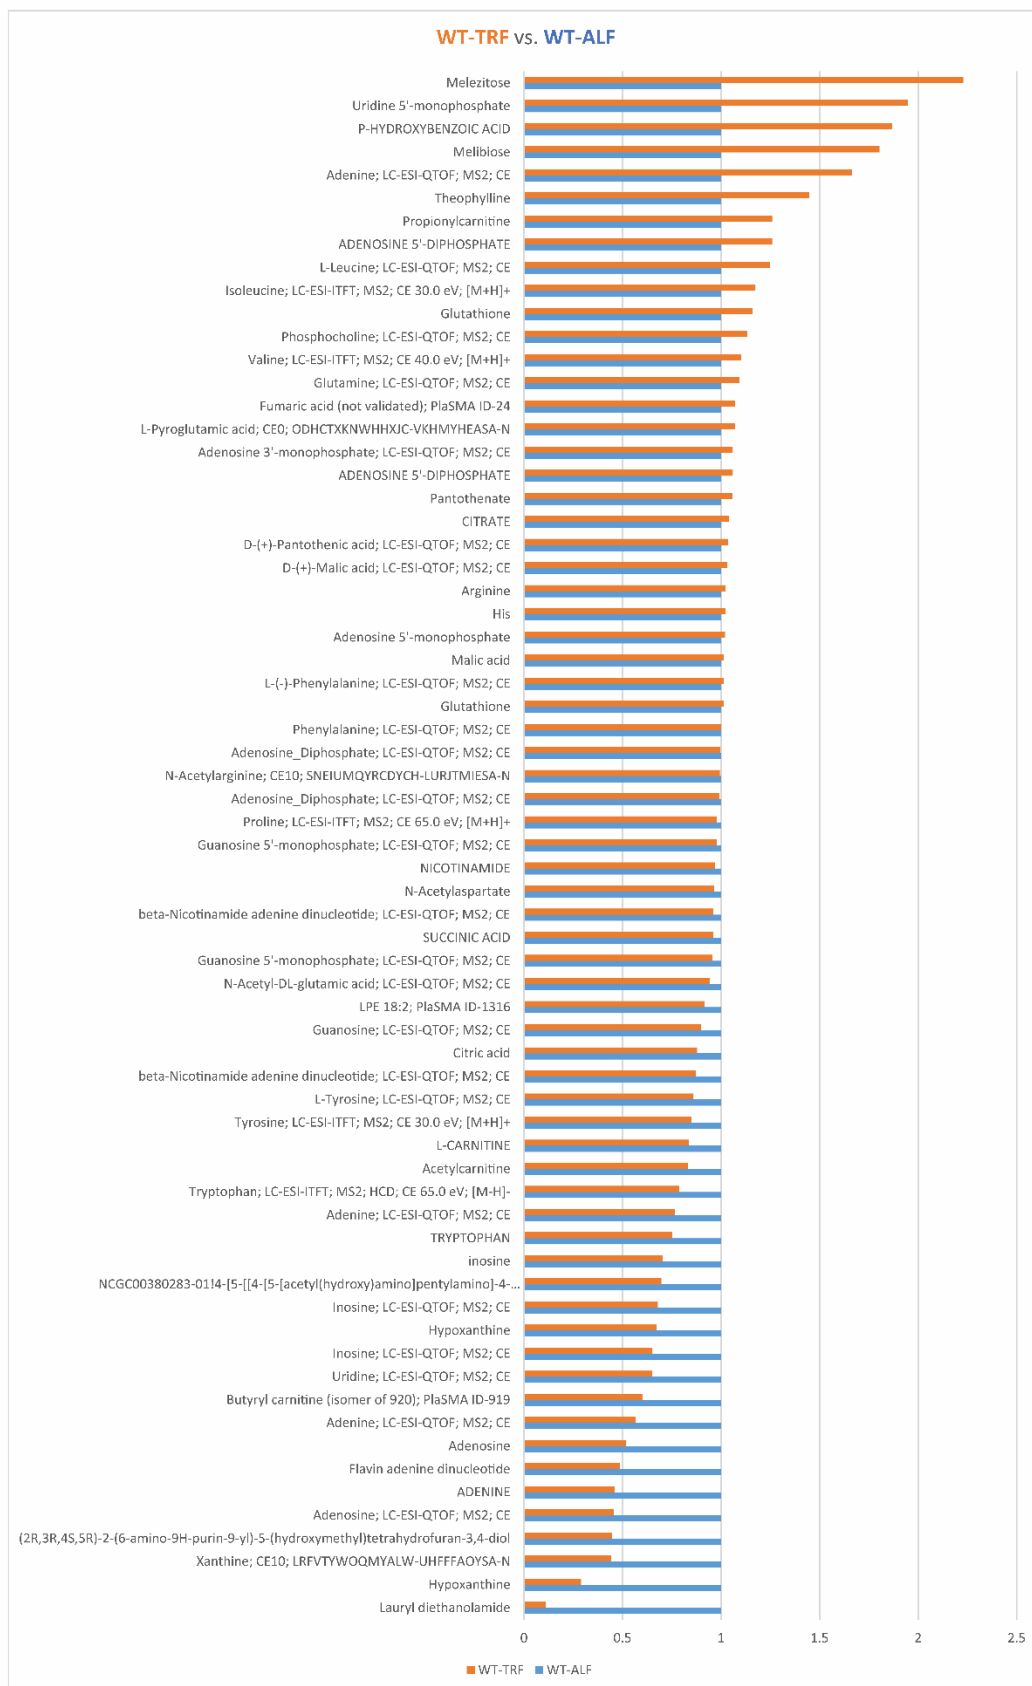

**Figure S9: Metabolites in IFM (WT-TRF vs. WT-ALF).**

(a) Untargeted metabolomics analysis was performed for WT-ALF (blue) and WT-TRF (orange) in 3-week-old female flies. The top 40 metabolites from the differential analysis were plotted with WT-ALF normalized to a value of 1-fold change.

# Figure S10

a

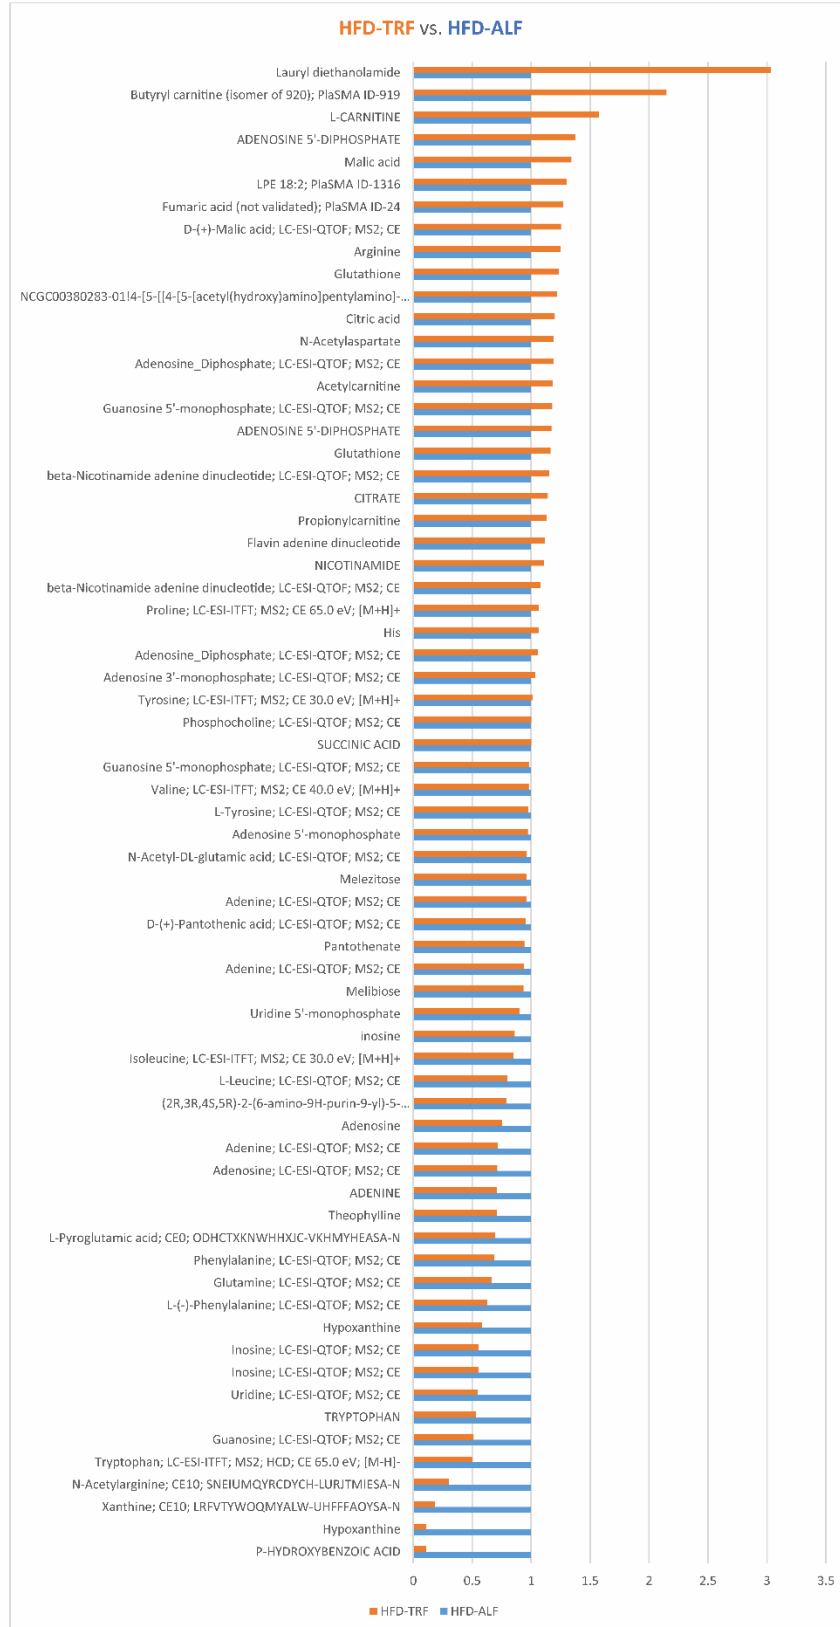

**Figure S10: Metabolites in IFM (HFD-TRF vs. HFD-ALF).**

(a) Untargeted metabolomics analysis was performed for HFD-ALF (blue) and HFD-TRF (orange) in 3-week-old female flies. The top 40 metabolites from the differential analysis were plotted with HFD-ALF normalized to a value of 1 fold change.

# Figure S11

a

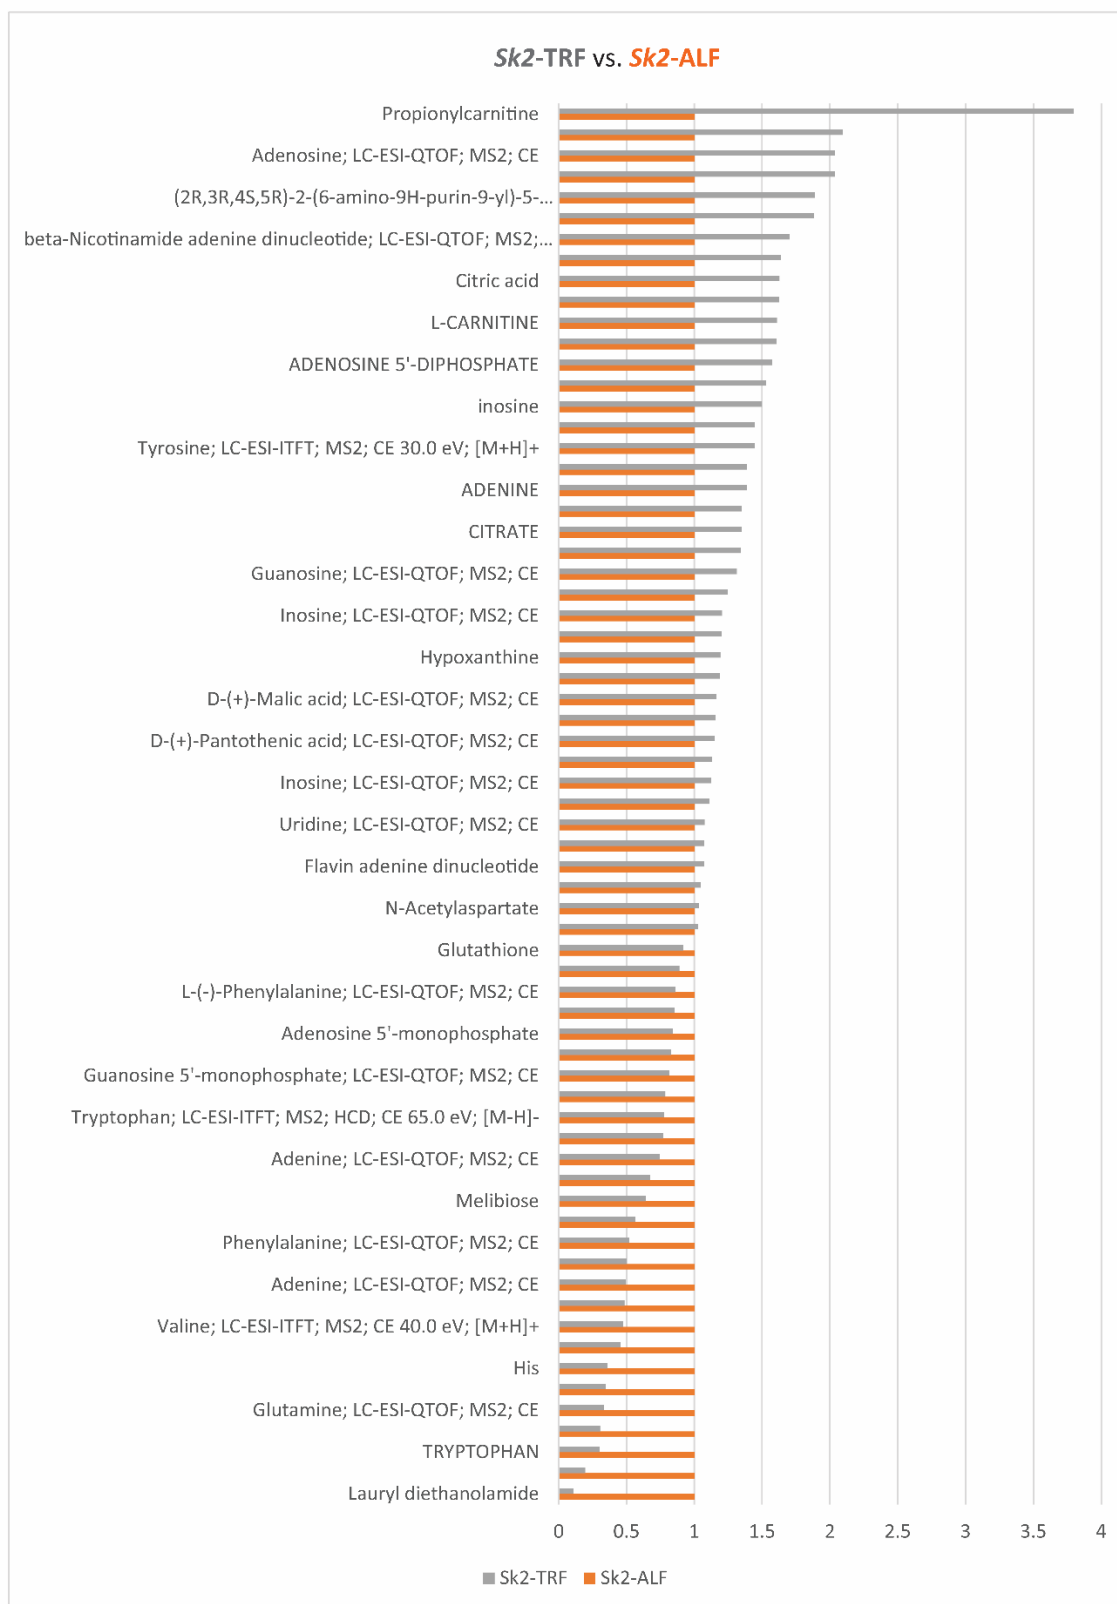

**Figure S11: Metabolites in IFM (Sk2-TRF vs. Sk2-ALF).**

(a) Untargeted metabolomics analysis was performed for Sk2-ALF (orange) and Sk2-TRF (gray) in 3-week-old female flies. The top 40 metabolites from the differential analysis were plotted with Sk2-ALF normalized to a value of 1 fold change.

# Figure S12

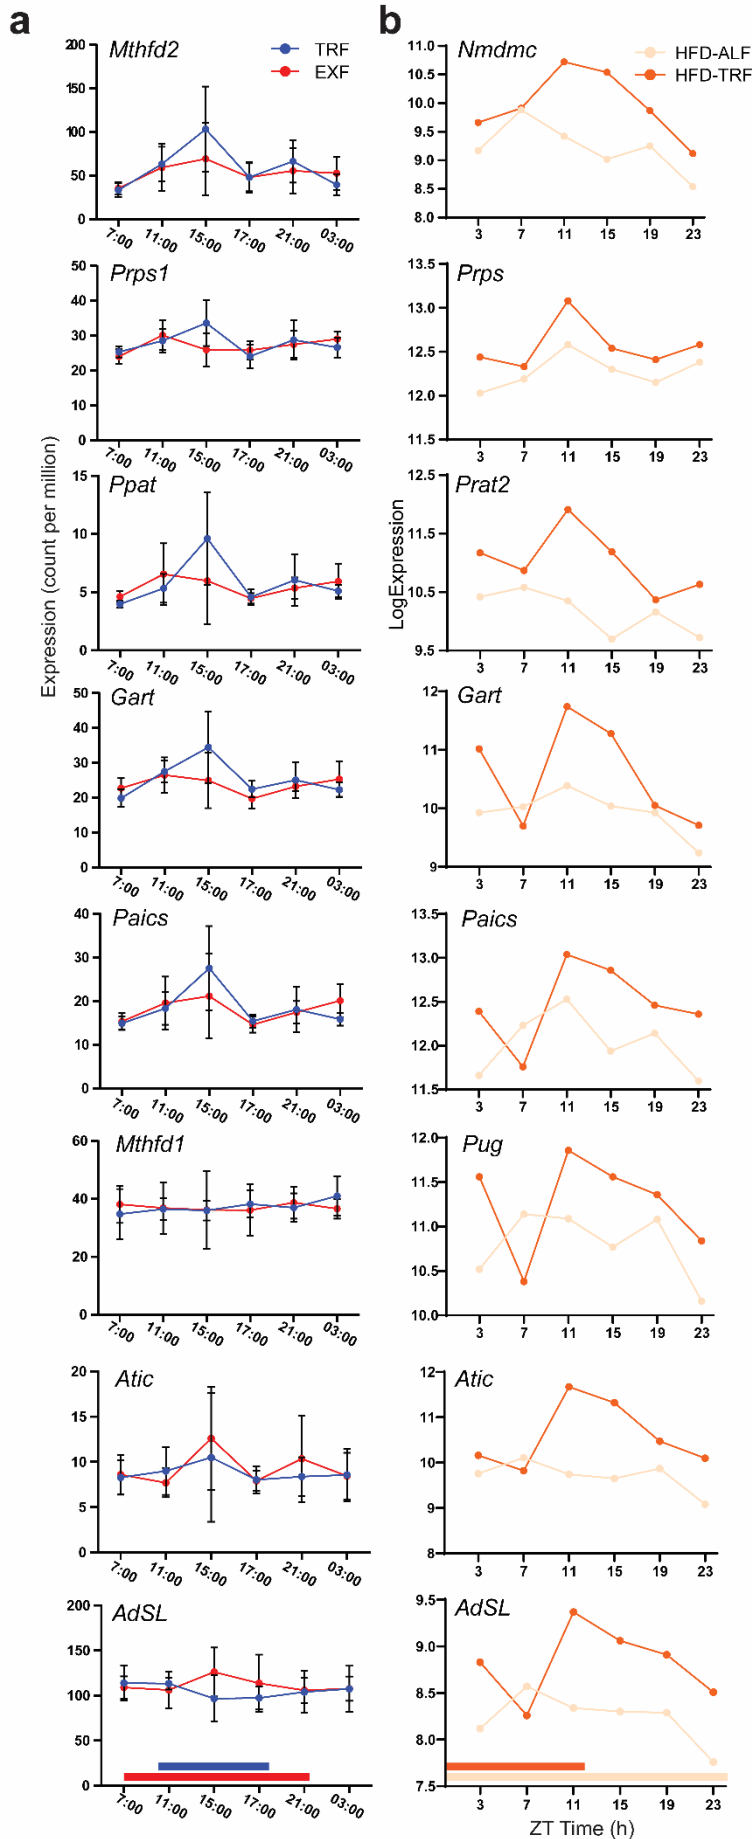

# Figure S12: Comparison with skeletal muscle transcriptomic data from obese men under TRF.

(a) Expression levels of genes associated with purine cycle and folate cycle found in a human RNA-seq dataset under EXF and TRF<sup>18</sup>. Mean  $\pm$  SEM is plotted for data collected from 6 men with overweight/obesity. 6 out of 11 participants are included as only these 6 participants have data collected for all time points from the original study. Participant IDs are 141, 312, 508, 536, 789, and 894.

(b) Expression levels of the same genes from (a) in our *Drosophila* RNA-seq dataset under HFD-ALF and HFD-TRF.
