# Supplementary material for: Time-restricted feeding promotes muscle function through purine cycle and AMPK signaling in Drosophila obesity models
Source: PubMed Central journal article supplement (PMC9944249; doi:10.1038/s41467-023-36474-4), 2023-02-21
Supplement: 41467_2023_36474_MOESM3_ESM.pdf [file 41467_2023_36474_MOESM3_ESM.pdf]

## Description of Additional Supplementary Files

**Supplementary Data 1:** Expression (Log Norm Count) of *Drosophila* skeletal muscle transcripts under ALF and TRF in WT, HFD, and *Sk2* models.

**Supplementary Data 2:** Differentially expressed gene analysis from DeSeq2 under TRF versus ALF in WT.

**Supplementary Data 3:** Differentially expressed gene analysis from DeSeq2 under TRF versus ALF in HFD.

**Supplementary Data 4:** Differentially expressed gene analysis from DeSeq2 under TRF versus ALF in *Sk2*.

**Supplementary Data 5:** FPKM of genes upregulated in HFD-TRF.

**Supplementary Data 6:** FPKM of genes upregulated in *Sk2*-TRF.

**Supplementary Data 7:** Average FPKM of all genes in pathways seen in Human (restricted vs unrestricted) Genes.

**Supplementary Data 8:** Glossary of *Drosophila* orthologs of human genes and metabolite abbreviations.
